# Supplementary material for: Physiological Characteristics of Putative Enterobacteria Associated with Meat and Fish Available in Southern Brazilian Retail Markets: Antimicrobial Susceptibility, Toxic Metal Tolerance and Expression of Efflux Pumps
Source: MDPI journal article supplement (doi:10.3390/antibiotics11121677), 2022-11-22
Supplement: s1 [file s1]

Article

# Physiological Characteristics of Putative Enterobacteria Associated with Meat and Fish Available in Southern Brazilian Retail Markets: Antimicrobial Susceptibility, Toxic Metal Tolerance and Expression of Efflux Pumps

Renata da Costa Barros Silva, Jéssica Andrade, Vanessa Cordeiro Dias, Jéssica Carla Sequeto, Nayara Felga Santos, Vânia Lúcia da Silva and Cláudio Galuppo Diniz \*

Laboratory of Microbial Physiology and Molecular Genetics, Center for Studies in Microbiology,  
Department of Parasitology, Microbiology and Immunology, Federal University of Juiz de Fora,  
Juiz de Fora 36036-330, Brazil

\* Correspondence: claudio.diniz@ufjf.br

## Supplementary Information

Table S1 Antimicrobial resistance phenotypes observed among mesophilic facultatively anaerobic Gram-negative rods presumptively characterized as enterobacteria isolated from meat and fish samples in Southern Brazilian retail markets.

| AMR phenotype | Number of bacteria isolates (n) and frequency (%) |           |           |           |           |
|---------------|---------------------------------------------------|-----------|-----------|-----------|-----------|
|               | Chicken                                           | Beef      | Pork      | Fish      | Total     |
|               | (n= 91)                                           | (n= 91)   | (n= 112)  | (n= 136)  | (n= 436)  |
| CFZ           | 12 (13.2)                                         | 25 (27.5) | 19 (17.0) | 30 (22.1) | 86 (20.0) |
| AMP           | 11 (12.1)                                         | 8 (8.8)   | 9 (8.0)   | 7 (5.1)   | 34 (7.9)  |
| CFO           | -                                                 | 4 (4.4)   | 4 (3.6)   | 1 (0.7)   | 9 (2.0)   |
| TET           | -                                                 | 1 (1.1)   | 3 (2.7)   | 1 (0.7)   | 5 (1.1)   |
| SUT           | -                                                 | -         | 2 (1.8)   | 1 (0.7)   | 3 (0.7)   |

|             |         |         |         |         |          |
|-------------|---------|---------|---------|---------|----------|
| ATM         | 1 (1.1) | -       | -       | 1 (0.7) | 2 (0.4)  |
| AMP-CFZ     | 4 (4.4) | 1 (1.1) | 1 (0.9) | 5 (3.7) | 11 (2.5) |
| CFZ-CFO     | 3 (3.3) | 2 (2.2) | 2 (1.8) | 1 (0.7) | 8 (1.8)  |
| AMP-TET     | -       | 1 (1.1) | 2 (1.8) | 1 (0.7) | 4 (0.9)  |
| AMC-AMP     | 1 (1.1) | 1 (1.1) | 2 (1.8) | -       | 3 (0.7)  |
| AMP-SUT     | 1 (1.1) | -       | 1 (.09) | -       | 2 (0.4)  |
| SUT-TET     | -       | 1 (1.1) | 1 (0.9) | -       | 2 (0.4)  |
| CFO-SUT     | 1 (1.1) | -       | -       | -       | 1 (0.2)  |
| AMI-CLO     | -       | 1 (1.1) | -       | -       | 1 (0.2)  |
| AMP-CFO     | -       | 1 (1.1) | -       | -       | 1 (0.2)  |
| CFO-TET     | -       | -       | 1 (0.9) | -       | 1 (0.2)  |
| ATM-CAZ     | 1 (1.1) | -       | -       | -       | 1 (0.2)  |
| AMC-CFZ-AMP | 4 (4.4) | 4 (4.4) | 9 (8.1) | 4 (2.9) | 21 (4.8) |
| AMC-CFO-AMP | -       | -       | -       | -       | 5 (1.1)  |
| AMP-AMC-CFZ | -       | -       | -       | -       | 7 (1.6)  |
| AMP-CLO-SUT | 1 (1.1) | -       | 1 (0.9) | -       | 2 (0.4)  |
| AMP-AMC-CFO | 1 (1.1) | -       | -       | -       | 1 (0.2)  |
| AMP-CFZ-CFO | 1 (1.1) | -       | -       | -       | 1 (0.2)  |
| CFZ-SUT-TET | -       | 1 (1.1) | -       | -       | 1 (0.2)  |
| AMP-CFZ-TET | -       | -       | 1 (0.9) | -       | 1 (0.2)  |
| AMP-CIP-CLO | -       | -       | 1 (0.9) | -       | 1 (0.2)  |
| AMP-SUT-TET | -       | -       | -       | 1 (0.7) | 1 (0.2)  |

|                             |           |           |          |         |          |
|-----------------------------|-----------|-----------|----------|---------|----------|
| CLO-SUT-TET                 | -         | -         | -        | 1 (0.7) | 1 (0.2)  |
| AMP-AMC-CFZ-CFO             | 14 (15.4) | 12 (13.2) | 10 (8.9) | 6 (4.4) | 42 (9.7) |
| AMP-CFZ-CFO-CLO             | 2 (2.2)   | -         | 1 (0.9)  | -       | 3 (0.7)  |
| AMP-AMC-CFZ-TET             | 1 (1.1)   | -         | -        | -       | 1 (0.2)  |
| AMP-CIP-LEV-TET             | 1 (1.1)   | -         | -        | -       | 1 (0.2)  |
| AMP-AMC-CFZ-CAZ             | 1 (1.1)   | -         | -        | -       | 1 (0.2)  |
| AMC-CFZ-CFO-TET             | -         | -         | -        | 1 (0.7) | 1 (0.2)  |
| AMP-AMC-CFZ-CFO-TET         | 1 (1.1)   | 1 (1.1)   | 1 (0.9)  | 1 (0.7) | 4 (0.9)  |
| AMP-AMC-CFZ-CLO-SUT         | -         | -         | 2 (1.8)  | -       | 2 (0.4)  |
| ATM-CPM-CFO-CAZ-CRO         | -         | -         | -        | 2 (1.5) | 2 (0.4)  |
| AMP-AMC-ATM-CFZ-CAZ         | 1 (1.1)   | -         | -        | -       | 1 (0.2)  |
| AMP-AMC-CFZ-CFO-CLO         | 1 (1.1)   | -         | -        | -       | 1 (0.2)  |
| AMP-AMC-CIP-CLO-LEV-<br>TET | 1 (1.1)   | 1 (1.1)   | 2 (1.8)  | -       | 4 (0.9)  |

AMP = ampicillin, 10 µg; ATM = aztreonam, 30 µg; AMC = amoxicillin/clavulanic acid, 30 µg, AMI = amikacin, 30 µg, GEN gentamicina, 10 µg; CIP = ciprofloxacin, 5 µg; LEV = levofloxacin, 5 µg; CFZ = cefazolin, 30 µg; CFO = ceftazidime, 30 µg; CAZ = ceftazidime, 30 µg; CRO = ceftriaxone, 30 µg; COM = cefepime, 30 µg; CLO = chloramphenicol, 30 µg; MPM = meropenem, 10 µg; SUT = sulfamethoxazole/trimethoprim, 25 µg; TET = tetracycline, 30 µg.
